# Supplementary figures and images for: Stalking im Jugendalter
Source: Atypon-hosted journal article supplement (doi:10.1026/0942-5403/a000350), 2021-09-03

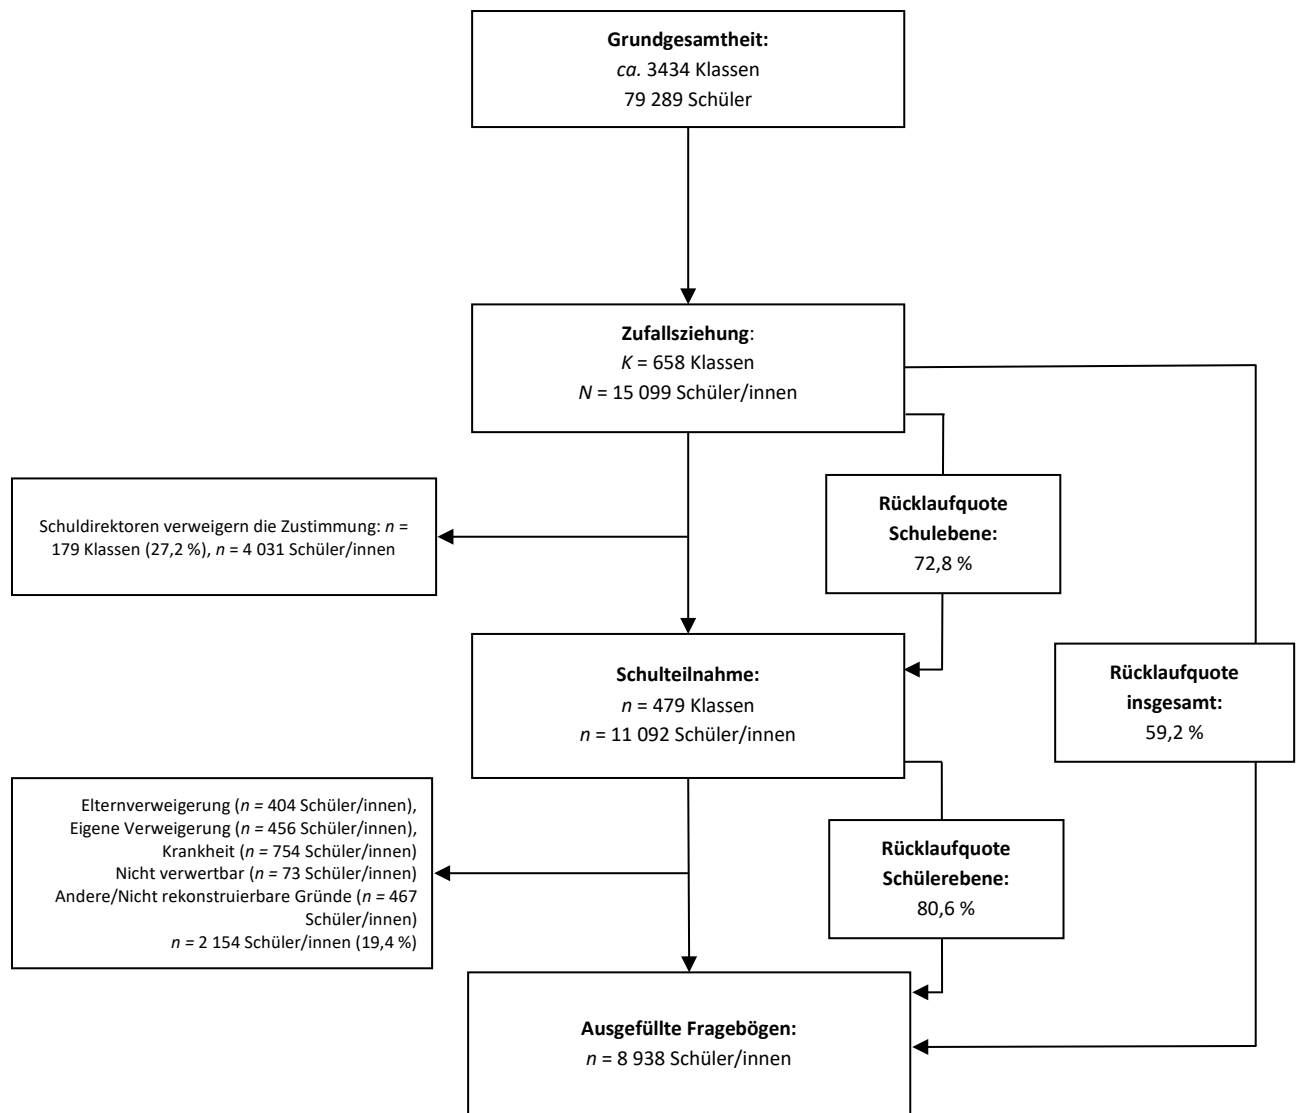

## Elektronisches Supplement 1.

Flowchart des Niedersachsensurveys 2017.

Supplement: 0942-5403_a000350_esm1.pdf [file 0942-5403_a000350_esm1.pdf]
